# Supplementary material for: Wheat Genetic Loci Conferring Resistance to Yellow Rust in the Face of Recent Epidemics of Genetically Diverse Races of the Fungus Puccinia Striiformis F. Sp. Tritici
Source: Research Square preprint supplement (doi:10.21203/rs.3.rs-459064/v1), 2021-04-27
Supplement: Supplementary file 2 [file 40f8d69c9f3bfd713748f48b.xlsx]

## Sheet: Sheet1
							MAGIC founder genotype
QTL	MAGIC resistant allele1	MAGIC susceptible allele1	KASP marker	Chr.	Position (cM)2	Position (bp)3	Al	Br	Cl	He	Ri	Ro	So	Xi	Illumina array sequene	Marker type	Allele A (HEX labelled, red)	Allele B (FAM-labeled, blue)	Primer A (HEX-labelled)4	Primer B (FAM-labelled)4	Primer C
QYr.niab-1A.1	Cl,He,So,Xi	Al,Br,Ri,Ro	tplb0021i12_383	1A	185.804	568025609	2	2	2	0	2	2	2	2	ACCACCTCTATGCCAGAGTATAACCTCAATCTGCCGTCCATCTCGGTTCC[C/T]GATTTGAGGAGTGCGATCACCGTCTCGAGGACGGTAACCAACGTTGGCGA	Co-dominant	He (call: C:C)	Al,Br,Cl,Ri,Ro,So,Xi (call: T:T)	GAAGGTCGGAGTCAACGGATTccgtccatctcggttccC	GAAGGTGACCAAGTTCATGCTccgtccatctcggttccT	gaatggagctcgccAacG
QYr.niab-1A.1	Cl,He,So,Xi	Al,Br,Ri,Ro	BobWhite_c44164_402	1A	178.013	572020396	2	2	2	0	2	2	0	2	TATTTGTTCTCCTTGGGCTGGCGGGACTATGTGTCAAACTCCGTAGGGCG[C/T]GGAAGCAAGATGGTGGGCCAGCATACCAGAAACTCGACGCACCAGAGCTA	Co-dominant
						Haplotype:	2.2	2.2	2.2	0	2.2	2.2	2	2.2
						Sus/Res1:	S	S	R	R	S	S	R	R
QYr.niab-2A.1	Al,Br,Cl,He,Ro,So	Ri,Xi	BS00062679_51	2A	142.773	615287707	2	2	2	2	0	2	2	0	GTTTCAGGCACAGTAGTAACAAATCTCCATCAACCAGACACGCAGGTATC[A/G]ATAAGTTGAATAACTATTGAACAGTCTAGCATATCTACAATAACTCACAT	Co-dominant	Al,Br,Cl,He,Ro,So	Ri,Xi	GAAGGTCGGAGTCAACGGATTaaccagacacgcaggtatcA	GAAGGTGACCAAGTTCATGCTaaccagacacgcaggtatcG	gggattgaggggcacttgta
QYr.niab-2A.1	Al,Br,Cl,He,Ro,So	Ri,Xi	BS00022641_51	2A	142.27	612422217	2	2	2	2	2	2	0	2	GAAACAAGGAAGGAAGCAAGCAAGCACAGATCAACACTTCATTCACTCTT[G/T]CTCCATTTGTGAAACAGGAACGTTTTTGCTTCAGGCCCCGAAGCATCCCA	Co-dominant	Al,Br,Cl,He,Ri,Ro,Xi (call C:C; mixture of resistant and suceptible alleles)	So (call: A:A; Soi susceptible allele)	GAAGGTCGGAGTCAACGGATTcAgatCaacacttcattcactcttG	GAAGGTGACCAAGTTCATGCTcAgatCaacacttcattcactcttT	agcaaaaacgttcctGTttcA
						Haplotype:	2.2	2.2	2.2	2.2	0.2	2.2	2	0.2
						Sus/Res1:	S	S	S	S	R	S	S	R
QYr.niab-2B.1	So	Al,Br,Cl,He,Ri,Ro,Xi	BS00016650_51	2B	271.917	683029170	2	2	2	2	2	2	0	2	CGAGGATTCAACCAAATTCTCACTTCCTATTTCTTCTCCTACTTGTCCTG[C/T]ACCGGGCATAACGCCATCAGTGGCATCCATCACCTTCTCACTTCCAACCT	Co-dominant	Al,Br,Cl,He,Ri,Ro,Xi (call: C:C; susceptible)	So (call: T:T; resistant)	GAAGGTCGGAGTCAACGGATTctATttCttctCctacttgtcctgC	GAAGGTGACCAAGTTCATGCTctATttCttctCctacttgtcctgT	ctgcTgttccaAgtagAgaGG
						Haplotype:	N/A	N/A	N/A	N/A	N/A	N/A	N/A	N/A
						Sus/Res1:	S	S	S	S	S	S	R	S
QYr.niab-2D.1	Al,Cl	Br,He,Ri,Ro,So,Xi	Kukri_c498_2381	2D	196.352	637653524	0	2	0	2	2	2	2	2	AGAGTTCGAGTCTTTCATAGAGTTTGCCCCGGATTACTTCAAGCATGTTT[A/G]CCACTCTCTCGACACCGGGAGCCAAACCTGCCTTGCCAAAATTCTAGGCA	Dominant	Al,Cl (call: null; resistant)	Br,He,Ri,Ro,So,Xi (call: A:A; susceptible)	GAAGGTCGGAGTCAACGGATTcggtgtcgagagagtggT	GAAGGTGACCAAGTTCATGCTcggtgtcgagagagtggC	acAgagttcgagtctttcatagaG
QYr.niab-2D.1	Al,Cl	Br,He,Ri,Ro,So,Xi	RAC875_c50347_258	2D	196.352	638290187	0	2	0	2	2	2	2	2	GCATTGCCAGAACTGACCTTCCTATTTGGTCTTGATCTGCATCAGGACTC[A/G]TGGGACTATGTGTGGCAATGTTGGCCAACTGGGTACCATCCCTCTATCGG	Dominant	Al,Cl (call: null; resistant)	Br,He,Ri,Ro,So,Xi (call: G:G; susceptible)	GAAGGTCGGAGTCAACGGATTtcttgatctgcatcaggactcA	GAAGGTGACCAAGTTCATGCTtcttgatctgcatcaggactcG	gtttgcatcCgaTagAgGGAT
QYr.niab-2D.1	Al,Cl	Br,He,Ri,Ro,So,Xi	Ra_c19051_1446	2D	192.183	638147722	0	2	0	2	2	2	2	2	ACAACCTTTGATCTAAATGAAACTCCTTTCAAAATGAAGGATGTGTACTT[A/G]gctcggatgagagtcctctccaaaacagttgaacttggcaaaacgcttct	Dominant	Al,Cl (call: null; resistant)	Br,He,Ri,Ro,So,Xi (call: G:G; susceptible)	GAAGGTCGGAGTCAACGGATTgagGactctcatccgagcT	GAAGGTGACCAAGTTCATGCTgagGactctcatccgagcC	gttgctcaagtgaatggtacttc
						Haplotype:	0.0.0	2.2.2	0.0.0	2.2.2	2.2.2	2.2.2	2.2.2	2.2.2
						Sus/Res1:	R	S	R	S	S	S	S	S
